# Supplementary material for: Molecular and clinical studies in 107 Noonan syndrome affected individuals with PTPN11 mutations
Source: PubMed Central journal article supplement (PMC7068896; doi:10.1186/s12881-020-0986-5), 2020-03-12
Supplement: 12881_2020_986_MOESM2_ESM.pdf [file 12881_2020_986_MOESM2_ESM.pdf]

### Additional File 1: Exon-wise comparison of the clinical features

| Exon Number                        | Broad forehead | Hypertelorism | Ptosis | Downward slanting palpebral fissures | Low set ears | Webbed neck | ASD   | VSD  | PS    | HCM  | Short stature | Cubitus Valgus | Pectus | Widely spaced nipples | Café au lait spots |
|------------------------------------|----------------|---------------|--------|--------------------------------------|--------------|-------------|-------|------|-------|------|---------------|----------------|--------|-----------------------|--------------------|
| <b>Exon 2</b>                      | 2/3            | 2/3           | 3/3    | 3/3                                  | 3/3          | 2/3         | 1/3   |      | 2/3   |      | 3/3           | 1/3            | 1/3    |                       |                    |
| <b>Exon3</b>                       | 5/38           | 15/38         | 13/38  | 23/38                                | 16/38        | 18/38       | 12/38 | 1/38 | 14/38 | 1/38 | 10/38         |                |        |                       | 3/38               |
| <b>Exon 4</b>                      | 1/4            | 2/4           | 2/4    | 3/4                                  | 3/4          | 1/4         | 1/4   | 1/4  | 2/4   |      | 1/4           | 1/4            | 2/4    | 1/4                   |                    |
| <b>Exon7</b>                       | 3/7            | 3/7           | 3/7    | 5/7                                  | 3/7          | 4/7         | 2/7   |      |       | 3/7  | 1/7           |                | 3/7    | 2/7                   | 2/7                |
| <b>Exon 8</b>                      | 6/28           | 10/28         | 11/28  | 17/28                                | 15/28        | 12/28       | 7/28  |      | 9/28  | 2/28 | 10/28         | 4/28           | 8/28   | 4/28                  |                    |
| <b>Exon9</b>                       | 1/2            | 1/2           |        |                                      | 1/2          | 1/2         |       |      |       |      | 1/2           |                |        |                       |                    |
| <b>Exon 12</b>                     | 3/6            | 1/6           | 3/6    | 6/6                                  | 4/6          | 4/6         | 1/6   |      | 1/6   | 1/6  | 2/6           | 1/6            | 3/6    | 2/6                   |                    |
| <b>Exon 13</b>                     | 5/19           | 7/19          | 10/19  | 12/19                                | 10/19        | 10/19       | 5/19  |      | 4/19  | 2/19 | 5/19          | 2/19           | 10/19  | 5/19                  | 1/19               |
| <b># 922<br/>A&gt;G<br/>Exon 8</b> | 3/12           | 7/12          | 4/12   | 12/12                                | 10/12        | 7/12        | 4/12  |      | 5/12  | 2/12 | 5/12          | 3/12           | 5/12   | 4/12                  |                    |

# The variation that is most commonly seen in *PTPN11* positive samples; PS – Pulmonary stenosis; ASD – Atrial septal defect; VSD – Ventricular septal defect; HCM – Hypertrophic cardiomyopathy
